# Supplementary material for: Bioinformatic analysis of methyltransferase-like protein family reveals clinical and functional outcomes in human cancer
Source: Research Square preprint supplement (doi:10.21203/rs.3.rs-148584/v1), 2021-01-23
Supplement: Supplementary file 1 [file fb57a458281cf81eadb2222a.pdf]

Table S11. Global and individual tumor type survival Z-scores in PRECOG dataset.

|           | Unweighted<br>meta-Z of all<br>tumors | Adrenocortical<br>cancer | Bladder<br>cancer | Brain cancer<br>Astrocytoma | Brain cancer<br>Glioblastoma | Brain cancer<br>Glioma | Brain cancer<br>Medulloblastoma | Brain cancer<br>Meningioma | Brain cancer<br>Neuroblastoma | Breast cancer | Colon cancer | Gastric cancer | Germ cell<br>tumors | Head and<br>neck cancer | Head and neck<br>cancer<br>Hypopharyngeal<br>cancer | Head and neck<br>cancer<br>Oesophageal<br>cancer | Head and neck<br>cancer<br>Oral SCC | Hematopoietic<br>cancer AML | Hematopoietic<br>cancer B ALL | Hematopoietic<br>cancer Burkitt<br>lymphoma | Hematopoietic<br>cancer CLL | Hematopoietic<br>cancer DLBCL | Hematopoietic<br>cancer FL | Hematopoietic<br>cancer MDS | Hematopoietic<br>cancer Multiple<br>myeloma | Kidney cancer | Liver cancer | Liver cancer<br>Primary | Lung cancer<br>ADENOC | Lung cancer<br>LOCC | Lung cancer<br>SCLC | Melanoma | Melanoma<br>Metastasis | Mesothelioma | Ovarian cancer | Pancreatic<br>cancer | Prostate cancer | Sarcoma<br>Ewing sarcoma | Osteo- |       |
|-----------|---------------------------------------|--------------------------|-------------------|-----------------------------|------------------------------|------------------------|---------------------------------|----------------------------|-------------------------------|---------------|--------------|----------------|---------------------|-------------------------|-----------------------------------------------------|--------------------------------------------------|-------------------------------------|-----------------------------|-------------------------------|---------------------------------------------|-----------------------------|-------------------------------|----------------------------|-----------------------------|---------------------------------------------|---------------|--------------|-------------------------|-----------------------|---------------------|---------------------|----------|------------------------|--------------|----------------|----------------------|-----------------|--------------------------|--------|-------|
| METTL1    | -0.17                                 | 0.33                     | 2.79              | 0.87                        | 2.82                         | 1.96                   | 1.17                            | 1.37                       | 0.45                          | 3.78          | -0.83        | 0.36           | 0.88                | -0.78                   | -1.47                                               | -                                                | 1.72                                | -0.46                       | 0.56                          | 1.79                                        | 1.42                        | 2.17                          | 1.96                       | -                           | 1.68                                        | -             | -0.43        | 0.11                    | 1.69                  | 1.43                | -0.14               | -0.91    | 0.92                   | 2.3          | 0.48           | -2.88                | 1.76            | 0.6                      | 1.35   | 0.89  |
| METTL9    | 0.51                                  | 0.21                     | 1.08              | 3.65                        | 0.29                         | 0.25                   | -                               | -0.21                      | 3.91                          | 2.18          | -1.31        | -0.22          | 1.82                | 0.82                    | -                                                   | -0.84                                            | -0.06                               | 3.85                        | 2.39                          | -                                           | 1.99                        | 4.65                          | 2.16                       | -                           | 0.28                                        | -             | -            | 1.3                     | -0.76                 | 0.97                | -0.27               | 1.29     | 0.15                   | -            | -3.21          | 1.23                 | 1.52            | 1.16                     | 0.86   |       |
| METTL5    | 0.34                                  | -0.81                    | 0.04              | -0.92                       | -0.56                        | -                      | 0.12                            | 5.81                       | 0.84                          | 0.77          | 1.23         | 1.89           | 2.13                | -                       | -                                                   | 0.83                                             | 2.25                                | 0.85                        | 1.46                          | -0.89                                       | 2.87                        | -0.3                          | -0.23                      | 1.72                        | -                                           | -0.32         | -            | 4.49                    | 0.21                  | 1.25                | -                   | -0.28    | -0.38                  | -            | 1.03           | -1.44                | -0.19           | 0.41                     | 0.37   |       |
| NTMT1     | 2.52                                  | -0.21                    | 0.86              | 3.25                        | -1.73                        | 1                      | -                               | 1.08                       | -                             | 4.05          | -1.2         | 0.51           | -0.84               | 1.44                    | -                                                   | -                                                | 1.83                                | -0.86                       | -0.97                         | -                                           | 0.56                        | 1.76                          | 1.64                       | -                           | 1.13                                        | -             | -0.27        | -                       | 4.4                   | 0.28                | 1.34                | -        | 0.77                   | 0.85         | -              | -3.71                | 0.9             | 1.15                     | 0.81   |       |
| METTL28   | 2.87                                  | -                        | 0.18              | -0.28                       | 0.52                         | -                      | -                               | 3.11                       | 3.71                          | 0.26          | -            | -              | -                   | -                       | 1.17                                                | -                                                | -                                   | 0.87                        | 0.82                          | -                                           | -                           | -0.31                         | -2.29                      | -                           | 2.03                                        | -             | 0.18         | -0.42                   | 1.43                  | -0.22               | 0.35                | -1.63    | 2.98                   | -            | 2.24           | 2.53                 | 1.55            | -                        | 2.4    |       |
| METTL34   | 2.53                                  | -                        | -1.7              | -                           | -                            | -                      | -                               | 4.74                       | -0.06                         | -2.51         | -            | -              | -                   | -                       | -                                                   | -                                                | -                                   | 0.87                        | 0.82                          | -                                           | -                           | -                             | -                          | -                           | 3.99                                        | -0.34         | -            | 3.83                    | 0.62                  | -1.14               | -0.55               | 0.01     | -                      | -            | 2.07           | 3                    | 1.48            | -                        | 1.11   |       |
| EEFLAKMT  | 2.48                                  | 0.04                     | -0.86             | -1.38                       | -1.95                        | -2.58                  | -                               | 0.41                       | 8.72                          | 0.7           | -1.08        | 1.35           | 1.39                | 0.25                    | -0.09                                               | 1.1                                              | 1.59                                | 0.12                        | 1.47                          | 0.7                                         | 0.81                        | 3.12                          | 2.54                       | -                           | 3.61                                        | -             | -1.15        | -                       | 0.84                  | 0.13                | 0.55                | -1.61    | -0.79                  | 1.89         | -1.89          | 0.06                 | -0.99           | 0.68                     | -0.13  |       |
| METTL6    | 2.09                                  | -1.27                    | -0.13             | -1.06                       | -0.18                        | -                      | 2.13                            | 3.1                        | 6.35                          | 6.42          | 1.51         | -              | -0.52               | -                       | 0.03                                                | 0.55                                             | 2.75                                | -0.78                       | -                             | 0.88                                        | 1.98                        | -                             | 1.08                       | -                           | 1.08                                        | -             | -0.39        | -                       | 0.85                  | -1.63               | 1.15                | -0.78    | 0.73                   | 1.82         | -              | 0.78                 | 0.28            | 0.97                     | 0.19   | 1.16  |
| METTL8    | 1.79                                  | 0.82                     | -1.57             | -0.48                       | 0.41                         | 0.19                   | -                               | 0.92                       | 4.29                          | -0.35         | -0.51        | 0.17           | -0.92               | -0.04                   | -                                                   | -                                                | 0.25                                | 1.31                        | 0.74                          | 1.48                                        | -0.89                       | 4.27                          | 1.19                       | -2.39                       | 0.75                                        | -             | -0.01        | -                       | 1.59                  | -0.77               | -1.27               | -0.41    | -0.79                  | 0.82         | -              | 0.01                 | -0.58           | 1.71                     | -1.47  | 1.84  |
| METTL5    | 1.23                                  | -                        | -                 | -                           | -                            | -                      | -                               | -                          | 0.49                          | -             | -            | -              | -                   | -                       | -                                                   | -                                                | -                                   | -                           | -                             | -                                           | -                           | -                             | -                          | -                           | -                                           | -             | -            | -                       | 1.75                  | -                   | 2.41                | 1.34     | -                      | -            | -              | -                    | -               | -                        | 2.16   |       |
| TRMT44    | 0.81                                  | -                        | -                 | -                           | -                            | -                      | -                               | -                          | 0.49                          | -             | -            | -              | -                   | -                       | -                                                   | -                                                | -                                   | -                           | -                             | -                                           | -                           | -                             | -                          | -                           | -                                           | -             | -            | -                       | 0.88                  | 0.88                | 1.89                | 1.12     | -0.16                  | -            | -              | -                    | -               | -                        | 0.24   |       |
| METTL22   | 0.58                                  | -                        | -                 | -                           | -                            | -                      | -                               | -                          | 1.4                           | -             | -            | -              | -                   | -                       | -                                                   | -                                                | -                                   | -                           | -                             | -                                           | -                           | -                             | -                          | -                           | -                                           | -             | -            | -                       | 0.52                  | -0.07               | 1.95                | 0.57     | -0.85                  | -            | -              | -                    | -               | -                        | -0.02  |       |
| METTL27   | 0.52                                  | -1.41                    | 0.47              | -                           | 0.44                         | 1.02                   | -                               | -0.65                      | 1.26                          | 0.87          | 1            | -0.25          | -                   | -0.71                   | -                                                   | -                                                | -0.67                               | 1.54                        | 1.33                          | -                                           | -                           | -                             | 0.6                        | 0.61                        | -                                           | 0.54          | -            | -                       | 0.18                  | -0.8                | -1.41               | 0.36     | -0.81                  | -0.5         | -              | -0.16                | 0.33            | 0.59                     | 0.52   | -0.59 |
| ETRBMT    | 0.42                                  | -                        | -                 | -                           | -                            | -                      | -                               | 0.55                       | -                             | -             | -            | -              | -                   | -                       | -                                                   | -                                                | -                                   | -                           | -                             | -                                           | -                           | -                             | -                          | -                           | -                                           | -             | -            | 0.09                    | 0.11                  | -                   | -                   | 0.02     | 0.54                   | -            | -              | -                    | -               | 1.34                     |        |       |
| CSBMT     | 0.26                                  | 1.7                      | 0.95              | -1.05                       | -1.52                        | -3.29                  | -                               | 0.21                       | 2.12                          | -1.25         | 0.9          | -0.83          | 2.3                 | -0.96                   | -                                                   | -                                                | 1.43                                | 0.2                         | 0.41                          | -                                           | 1.34                        | -0.02                         | -1.9                       | -                           | -2.39                                       | -1.4          | -1.29        | -0.28                   | 0.77                  | -1.09               | 0.97                | 0.83     | 0.42                   | -1.31        | -              | -0.32                | 1.93            | -0.21                    | -0.24  | -0.3  |
| METTL4    | 0.19                                  | -0.49                    | 0.39              | 2.21                        | 0.59                         | 1.14                   | -                               | -3                         | 0.9                           | 1.3           | 1.06         | -1.26          | -0.74               | -1.71                   | -                                                   | -                                                | 0.58                                | -1.19                       | -0.08                         | -0.97                                       | 0.17                        | 2.28                          | -0.88                      | -                           | 2.39                                        | -             | -            | -                       | 0.72                  | -0.73               | 0.22                | 0.2      | 0.02                   | -            | 0.28           | -                    | -               | -                        | -0.45  |       |
| METTL7    | 0.01                                  | -                        | -                 | -                           | -0.86                        | -                      | -                               | 0.88                       | -                             | -             | -            | -              | -                   | -                       | -                                                   | -                                                | -                                   | -                           | -                             | -                                           | -                           | -                             | -                          | -                           | -                                           | -             | -            | -                       | -                     | -0.38               | 1.38                | -        | -1.46                  | 0.62         | -              | -                    | -               | -                        | -1.87  |       |
| METTL21C  | -0.03                                 | -                        | -                 | -                           | -                            | -                      | -                               | 1.17                       | -                             | -             | -            | -              | -                   | -                       | -                                                   | -                                                | -                                   | -                           | -                             | -                                           | -                           | -                             | -                          | -                           | -                                           | -             | -            | -                       | -                     | -0.38               | 1.38                | -        | -1.46                  | 0.62         | -              | -                    | -               | -                        | -1.87  |       |
| VCMPT     | -0.11                                 | -                        | -                 | -                           | -                            | -                      | -                               | -0.02                      | -                             | -             | -            | -              | -                   | -                       | -                                                   | -                                                | -                                   | -                           | -                             | -                                           | -                           | -                             | -                          | -                           | -                                           | -             | -            | -                       | 0.71                  | 1.71                | -1.83               | 0.41     | 0.28                   | -            | -              | -0.34                | -               | -                        | -1.52  |       |
| METTL21A  | -0.11                                 | -                        | -                 | -                           | -                            | -                      | -                               | -0.05                      | -                             | -             | -            | -              | -                   | -                       | -                                                   | -                                                | -                                   | -                           | -                             | -                                           | -                           | -                             | -                          | -                           | -                                           | -             | -            | -                       | 0.34                  | 0.78                | -1.09               | -0.88    | -                      | -            | -              | -                    | -               | -                        | 1.6    |       |
| METTL36   | -0.12                                 | -                        | -                 | -                           | -0.74                        | -                      | -                               | 0.9                        | -                             | -             | -            | -              | -                   | -                       | -                                                   | -                                                | -                                   | -                           | -                             | -                                           | -                           | -                             | -                          | -                           | -                                           | -             | -            | -                       | -                     | 0.24                | 0.46                | 0.35     | -                      | -            | -              | -                    | -               | -                        | -      | -1.05 |
| EEFLAKMT3 | -0.22                                 | -                        | -                 | -                           | 0.72                         | -                      | -                               | -                          | -1.25                         | -             | -            | -              | -                   | -                       | -                                                   | -                                                | -                                   | -                           | -                             | -                                           | -                           | -                             | -                          | -                           | -                                           | -             | -            | -                       | 0.08                  | 0.46                | -0.12               | 0.06     | -1.55                  | -            | -              | -0.88                | -               | -                        | -0.12  |       |
| METTL31   | -0.67                                 | -                        | -                 | -                           | -1.02                        | -                      | -                               | -1.16                      | -                             | -             | -            | -              | -                   | -                       | -                                                   | -                                                | -                                   | -                           | -                             | -                                           | -                           | -                             | -                          | -                           | -                                           | -             | -            | -                       | -                     | 0.81                | -0.41               | 0.15     | 0.48                   | -0.23        | -              | -1.21                | -               | -                        | -      | 1.68  |
| EEFLAKMT2 | -0.74                                 | 1.69                     | -0.3              | -3.62                       | -0.44                        | -7.08                  | -                               | -1.06                      | -0.36                         | -1.98         | 1.81         | 0.26           | -0.11               | 1.57                    | -                                                   | -                                                | 2.03                                | -0.25                       | -0.04                         | -                                           | 0.86                        | 0.7                           | -2.14                      | -                           | -1.81                                       | 1.09          | -0.93        | -0.13                   | 0.19                  | 1.5                 | 0.45                | -0.52    | 0.47                   | 0.81         | -              | 1.87                 | -0.32           | -1.72                    | 1.89   | -0.84 |
| RRIND1    | -0.9                                  | -                        | -                 | -                           | -1.25                        | -                      | -                               | -                          | -1.79                         | -             | -            | -              | -                   | -                       | -                                                   | -                                                | -                                   | -                           | -                             | -                                           | -                           | -                             | -                          | -                           | -                                           | -             | -            | -                       | -                     | -0.44               | -1.38               | 0.74     | -1.11                  | 0.57         | -              | -0.12                | -               | -                        | -      | -0.64 |
| METTL6    | -2.07                                 | -0.34                    | -0.55             | -0.63                       | -1.54                        | -0.72                  | -                               | 1.07                       | 1.92                          | -1.74         | -0.39        | -0.64          | 1.06                | -0.83                   | -                                                   | 0.68                                             | 1.1                                 | 0.38                        | -1.4                          | -2.85                                       | 2.16                        | 1.67                          | -                          | -2.54                       | -1.81                                       | 0.49          | -            | -0.87                   | 0.27                  | 1.79                | -1.38               | -1.03    | 1.95                   | -            | -0.19          | -0.05                | -0.88           | 1.28                     | 0.42   |       |
| METTL3    | -2.52                                 | -2.22                    | -0.15             | -1.24                       | -0.32                        | -2.71                  | -                               | -2.58                      | -0.64                         | -1.49         | -0.36        | -0.26          | 2.7                 | -0.48                   | 0.75                                                | -                                                | -2.83                               | 1.34                        | 0.67                          | 0.29                                        | 0                           | 1.83                          | -0.45                      | -                           | -                                           | 0.9           | -1.45        | -1.38                   | 0.56                  | -0.66               | -0.66               | -1.44    | -1.58                  | -1.08        | 0.34           | 0.68                 | -1.59           | -0.05                    | 0.71   |       |
| METTL3    | -2.76                                 | -2.59                    | -3.08             | -0.53                       | 0.27                         | -1.45                  | -                               | 0.35                       | -1.54                         | -1.81         | 0.23         | -0.12          | -4.43               | -1.31                   | 1.72                                                | -                                                | -0.74                               | 1.65                        | 0.8                           | -0.45                                       | 1.62                        | 1.25                          | 0.31                       | 0.43                        | -2.03                                       | -3.48         | -0.3         | -                       | -4.86                 | -0.56               | -0.73               | -0.8     | -1                     | -3.7         | -3.72          | -0.16                | -1.28           | -2.15                    | -2.78  | -0.81 |
